# Supplementary material for: Training and External Validation of a Predict Nomogram for Type 2 Diabetic Peripheral Neuropathy
Source: MDPI journal article supplement (doi:10.3390/diagnostics13071265), 2023-03-27
Supplement: s1 [file s1]

# Supplementary Material: Training and external validation of a predict nomogram for diabetic peripheral neuropathy among type 2 diabetes population

Yongsheng Li, Yongnan Li, Ning Deng, Haonan Shi, Siqingaowa·CaiKa, Gan Sen

**Table S1.** Net benefits for different threshold probabilities in the external validation cohort.

| Threshold | All         | None | Predmodel   |
|-----------|-------------|------|-------------|
| 0.01      | 0.50964951  | 0    | 0.50964951  |
| 0.02      | 0.504645933 | 0    | 0.504645933 |
| 0.03      | 0.49953919  | 0    | 0.49957134  |
| 0.04      | 0.494326057 | 0    | 0.494629245 |
| 0.05      | 0.489003173 | 0    | 0.488620199 |
| 0.06      | 0.483567037 | 0    | 0.483014111 |
| 0.07      | 0.478013994 | 0    | 0.479299399 |
| 0.08      | 0.472340233 | 0    | 0.474509627 |
| 0.09      | 0.466541774 | 0    | 0.470699778 |
| 0.10      | 0.460614461 | 0    | 0.468121968 |
| 0.11      | 0.454553949 | 0    | 0.460323764 |
| 0.12      | 0.448355698 | 0    | 0.454120204 |
| 0.13      | 0.442014959 | 0    | 0.446949602 |
| 0.14      | 0.435526761 | 0    | 0.442005512 |
| 0.15      | 0.428885899 | 0    | 0.438180262 |
| 0.16      | 0.422086922 | 0    | 0.429412929 |
| 0.17      | 0.415124114 | 0    | 0.421473837 |
| 0.18      | 0.407991481 | 0    | 0.416206075 |
| 0.19      | 0.400682734 | 0    | 0.408138908 |
| 0.20      | 0.393191268 | 0    | 0.402286902 |
| 0.21      | 0.385510145 | 0    | 0.395260402 |
| 0.22      | 0.37763207  | 0    | 0.39146543  |
| 0.23      | 0.36954937  | 0    | 0.383629884 |
| 0.24      | 0.361253967 | 0    | 0.378761352 |
| 0.25      | 0.352737353 | 0    | 0.373180873 |
| 0.26      | 0.34399056  | 0    | 0.368770017 |
| 0.27      | 0.33500413  | 0    | 0.362301712 |
| 0.28      | 0.325768076 | 0    | 0.360822361 |
| 0.29      | 0.316271851 | 0    | 0.359023162 |
| 0.30      | 0.306504307 | 0    | 0.356103356 |
| 0.31      | 0.296453644 | 0    | 0.353912441 |
| 0.32      | 0.286107374 | 0    | 0.353369206 |
| 0.33      | 0.275452261 | 0    | 0.34782946  |
| 0.34      | 0.264474264 | 0    | 0.345964846 |
| 0.35      | 0.253158484 | 0    | 0.343115305 |
| 0.36      | 0.241489085 | 0    | 0.341930873 |
| 0.37      | 0.229449229 | 0    | 0.342672343 |
| 0.38      | 0.217020991 | 0    | 0.340319227 |
| 0.39      | 0.20418527  | 0    | 0.336133738 |
| 0.40      | 0.190921691 | 0    | 0.332640333 |
| 0.41      | 0.177208499 | 0    | 0.330156101 |
| 0.42      | 0.163022439 | 0    | 0.327729586 |
| 0.43      | 0.148338622 | 0    | 0.324834956 |
| 0.44      | 0.133130383 | 0    | 0.320611821 |
| 0.45      | 0.117369117 | 0    | 0.322717823 |
| 0.46      | 0.101024101 | 0    | 0.321167321 |
| 0.47      | 0.084062292 | 0    | 0.318185384 |

|      |              |   |              |
|------|--------------|---|--------------|
| 0.48 | 0.066448105  | 0 | 0.32016632   |
| 0.49 | 0.048143166  | 0 | 0.31655864   |
| 0.50 | 0.029106029  | 0 | 0.313929314  |
| 0.51 | 0.009291866  | 0 | 0.311404811  |
| 0.52 | -0.011347886 | 0 | 0.305959806  |
| 0.53 | -0.032865926 | 0 | 0.303578538  |
| 0.54 | -0.055319534 | 0 | 0.308370243  |
| 0.55 | -0.078771079 | 0 | 0.306306306  |
| 0.56 | -0.103288603 | 0 | 0.302967303  |
| 0.57 | -0.128946478 | 0 | 0.298167577  |
| 0.58 | -0.155826156 | 0 | 0.298881299  |
| 0.59 | -0.184017038 | 0 | 0.291161706  |
| 0.60 | -0.213617464 | 0 | 0.285862786  |
| 0.61 | -0.24473586  | 0 | 0.284796631  |
| 0.62 | -0.277492067 | 0 | 0.273662326  |
| 0.63 | -0.31201888  | 0 | 0.268977918  |
| 0.64 | -0.348463848 | 0 | 0.262531763  |
| 0.65 | -0.386991387 | 0 | 0.257944758  |
| 0.66 | -0.427785251 | 0 | 0.248318454  |
| 0.67 | -0.471051471 | 0 | 0.23965224   |
| 0.68 | -0.51702183  | 0 | 0.227780665  |
| 0.69 | -0.565958018 | 0 | 0.22563879   |
| 0.70 | -0.618156618 | 0 | 0.215523216  |
| 0.71 | -0.673955122 | 0 | 0.213742921  |
| 0.72 | -0.733739234 | 0 | 0.199138699  |
| 0.73 | -0.797951798 | 0 | 0.196735197  |
| 0.74 | -0.86710379  | 0 | 0.194786502  |
| 0.75 | -0.941787942 | 0 | 0.193347193  |
| 0.76 | -1.022695773 | 0 | 0.191961192  |
| 0.77 | -1.110639067 | 0 | 0.191268191  |
| 0.78 | -1.206577207 | 0 | 0.183991684  |
| 0.79 | -1.311652312 | 0 | 0.168399168  |
| 0.80 | -1.427234927 | 0 | 0.159043659  |
| 0.81 | -1.554984134 | 0 | 0.140606193  |
| 0.82 | -1.696927697 | 0 | 0.135250635  |
| 0.83 | -1.855570503 | 0 | 0.130610248  |
| 0.84 | -2.034043659 | 0 | 0.116943867  |
| 0.85 | -2.236313236 | 0 | 0.114345114  |
| 0.86 | -2.467478467 | 0 | 0.097119097  |
| 0.87 | -2.73420758  | 0 | 0.085319047  |
| 0.88 | -3.045391545 | 0 | 0.079348579  |
| 0.89 | -3.413154413 | 0 | 0.071064071  |
| 0.90 | -3.854469854 | 0 | 0.055093555  |
| 0.91 | -4.393855394 | 0 | 0.040887041  |
| 0.92 | -5.068087318 | 0 | 0.046257796  |
| 0.93 | -5.934956935 | 0 | 0.026136026  |
| 0.94 | -7.090783091 | 0 | 0.004158004  |
| 0.95 | -8.708939709 | 0 | -0.021829522 |
| 0.96 | -11.13617464 | 0 | -0.023908524 |
| 0.97 | -15.18156618 | 0 | -0.054747055 |
| 0.98 | -23.27234927 | 0 | 0.003118503  |
| 0.99 | -47.54469855 | 0 | 0.002079002  |
